# Supplementary material for: The pattern of histone H3 epigenetic posttranslational modifications is regulated by the VRK1 chromatin kinase
Source: PubMed Central journal article supplement (PMC10182654; doi:10.1186/s13072-023-00494-7), 2023-05-13
Supplement: 13072_2023_494_MOESM5_ESM.pdf [file 13072_2023_494_MOESM5_ESM.pdf]

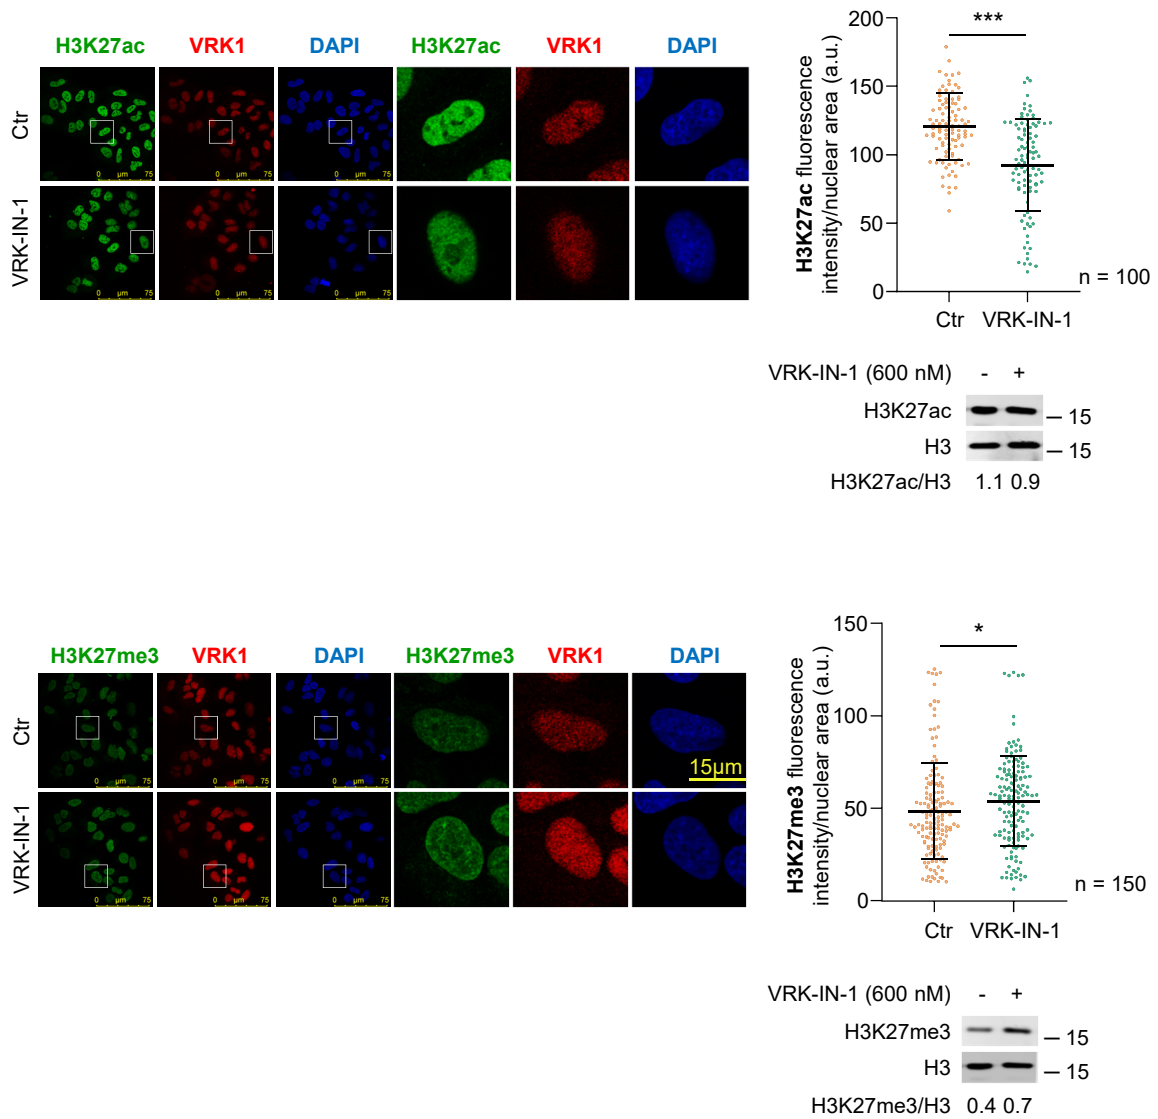

**Figure S5.** Effect of VRK1 inhibition with VRK1-IN-1 on epigenetic modification of H3K27 acetylation (top) and methylation (bottom) in A549 cells. Ctr: control
