# Supplementary material for: The pattern of histone H3 epigenetic posttranslational modifications is regulated by the VRK1 chromatin kinase
Source: PubMed Central journal article supplement (PMC10182654; doi:10.1186/s13072-023-00494-7), 2023-05-13
Supplement: 13072_2023_494_MOESM6_ESM.pdf [file 13072_2023_494_MOESM6_ESM.pdf]

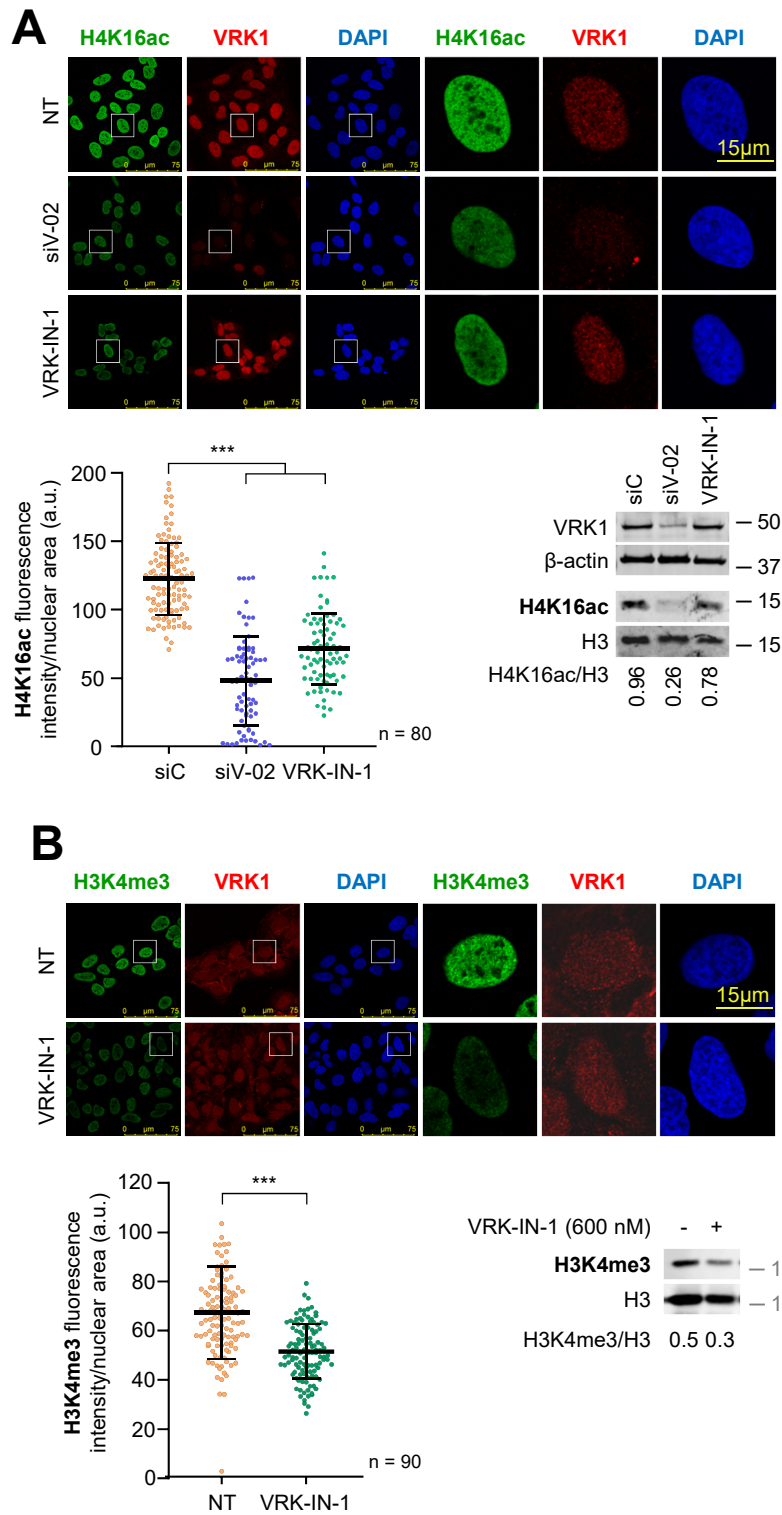

**Figure S6.** Effect of VRK1 depletion or inhibition with VRK1-IN-1 on epigenetic modifications of H4K16 and H3K4 in U2OS cells. **A.** Effect of depletion and VRK1-IN-1 on histone H4K16ac. **B.** Effect of VRK1-IN-1 on histone H3K4me3 levels.
