# Supplementary material for: The pattern of histone H3 epigenetic posttranslational modifications is regulated by the VRK1 chromatin kinase
Source: PubMed Central journal article supplement (PMC10182654; doi:10.1186/s13072-023-00494-7), 2023-05-13
Supplement: 13072_2023_494_MOESM9_ESM.pdf [file 13072_2023_494_MOESM9_ESM.pdf]

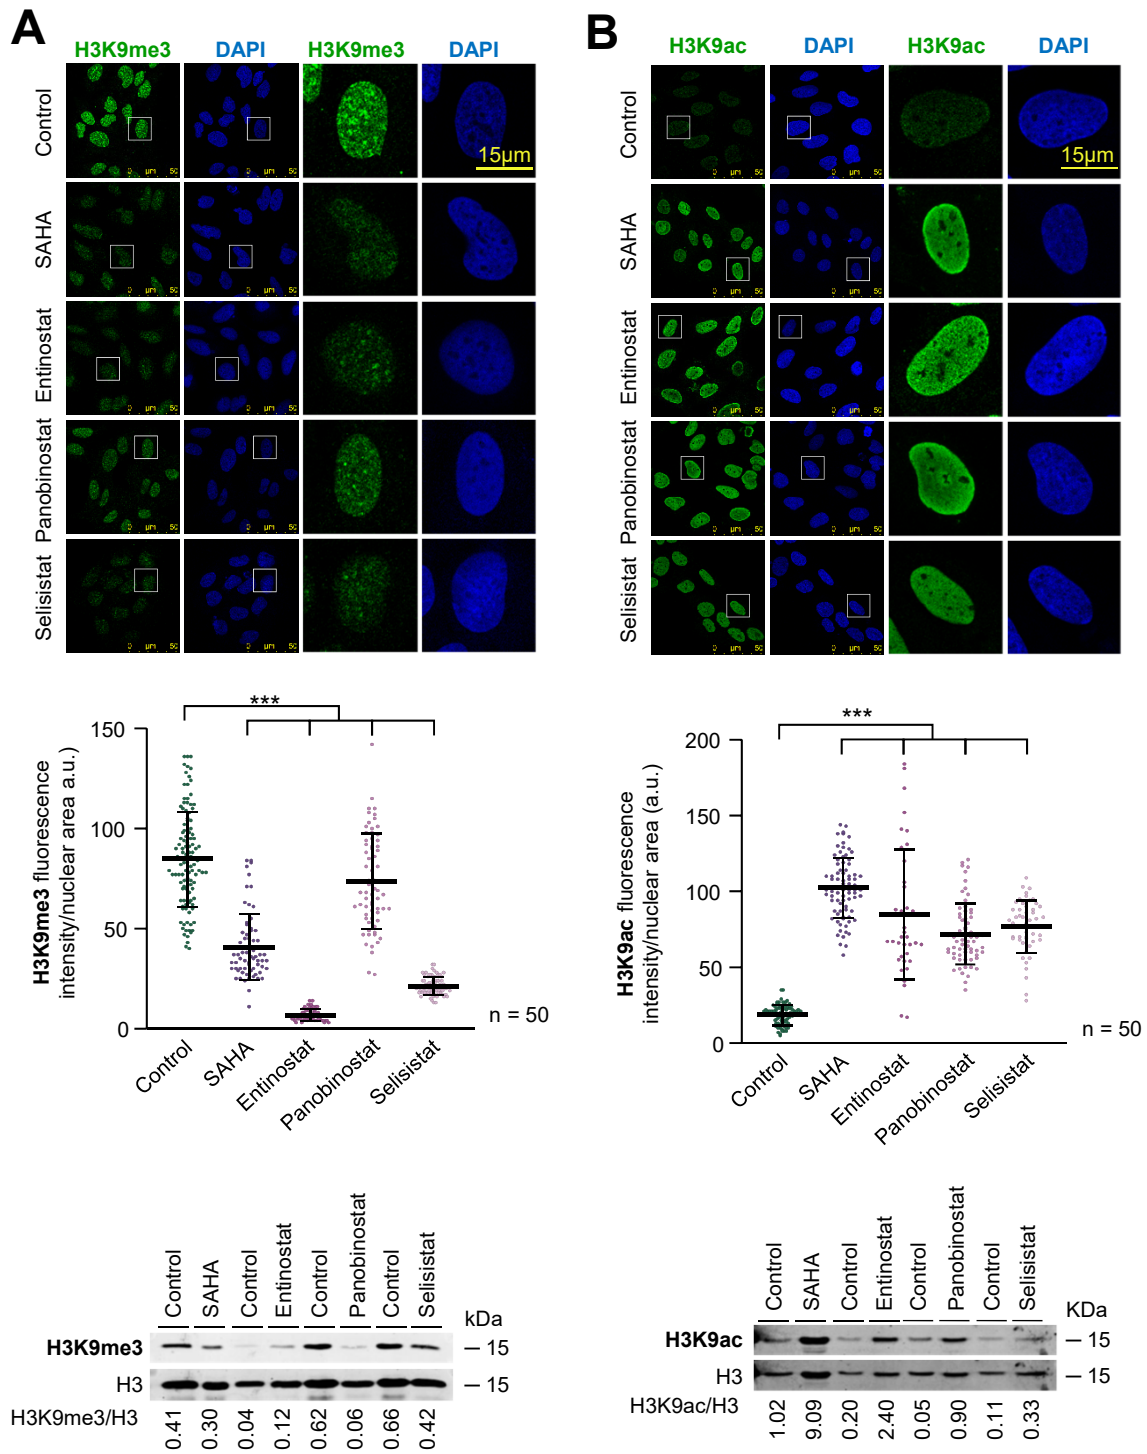

**Figure S9.** Effect of HDAC inhibitors on histone H3K9 epigenetic modifications in serum-deprived U2OS cells. **A.** Effect of HDAC inhibitors on H3K9me3 levels. **B.** Effect of HDAC inhibitors on H3K9ac levels.
