# Supplementary material for: The pattern of histone H3 epigenetic posttranslational modifications is regulated by the VRK1 chromatin kinase
Source: PubMed Central journal article supplement (PMC10182654; doi:10.1186/s13072-023-00494-7), 2023-05-13
Supplement: 13072_2023_494_MOESM10_ESM.pdf [file 13072_2023_494_MOESM10_ESM.pdf]

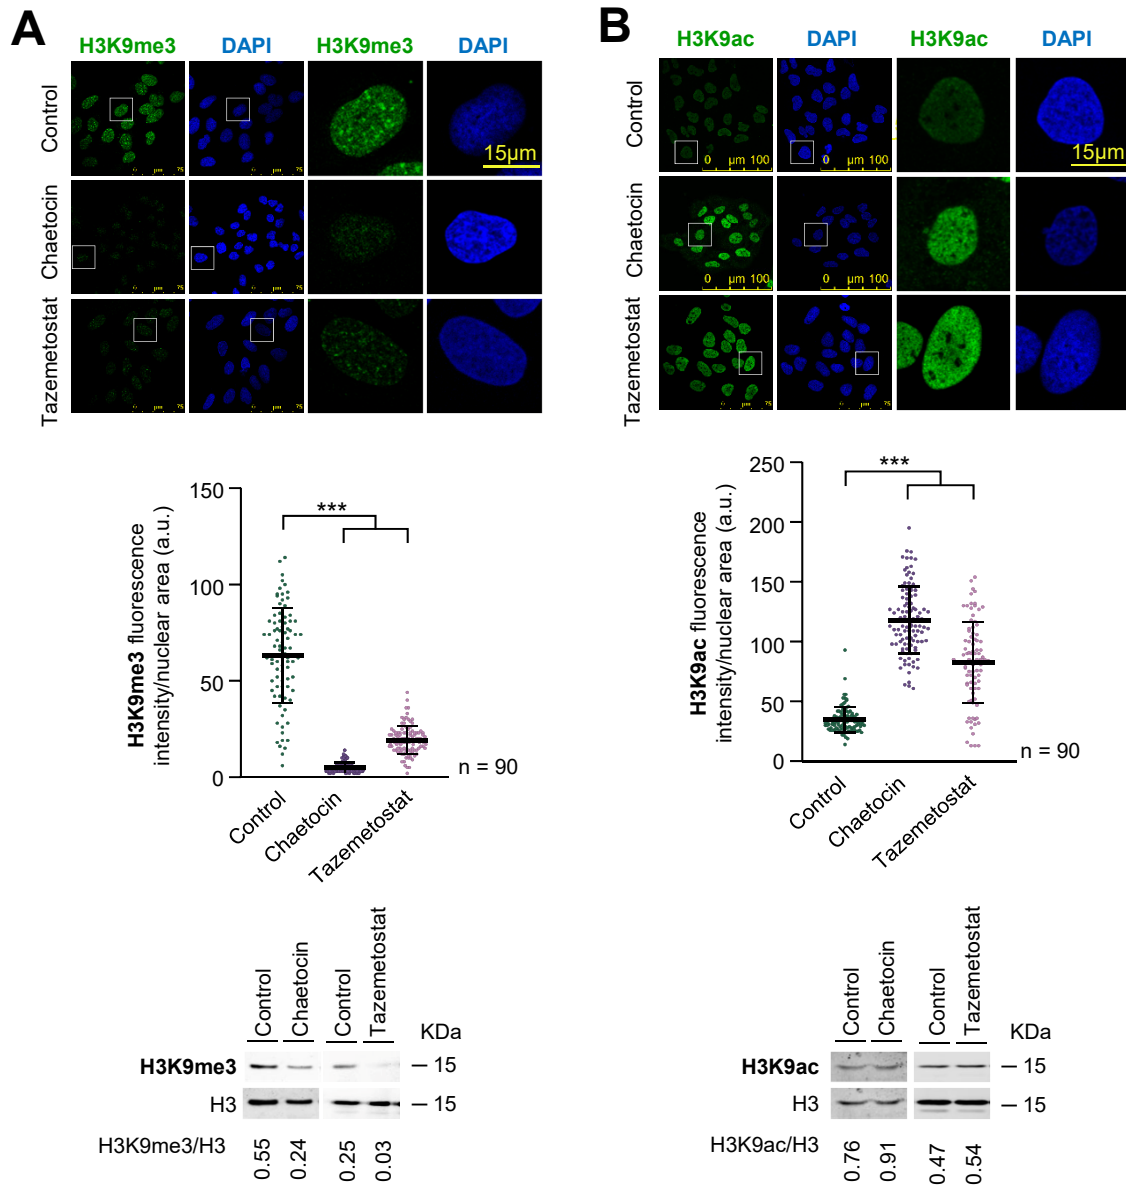

**Figure S10.** Effect of KMT inhibitors, tazemetostat and chaetocin, on histone H3K9 epigenetic modifications in serum-deprived U2OS cells. **A.** Effect of KMT inhibitors on H3K9me3 levels. **B.** Effect of KMT inhibitors on H3K9ac levels. The middle panel shows the quantification of the fluorescence. The immunoblots of the two modifications are shown at the bottom.
