# Supplementary material for: The pattern of histone H3 epigenetic posttranslational modifications is regulated by the VRK1 chromatin kinase
Source: PubMed Central journal article supplement (PMC10182654; doi:10.1186/s13072-023-00494-7), 2023-05-13
Supplement: 13072_2023_494_MOESM12_ESM.pdf [file 13072_2023_494_MOESM12_ESM.pdf]

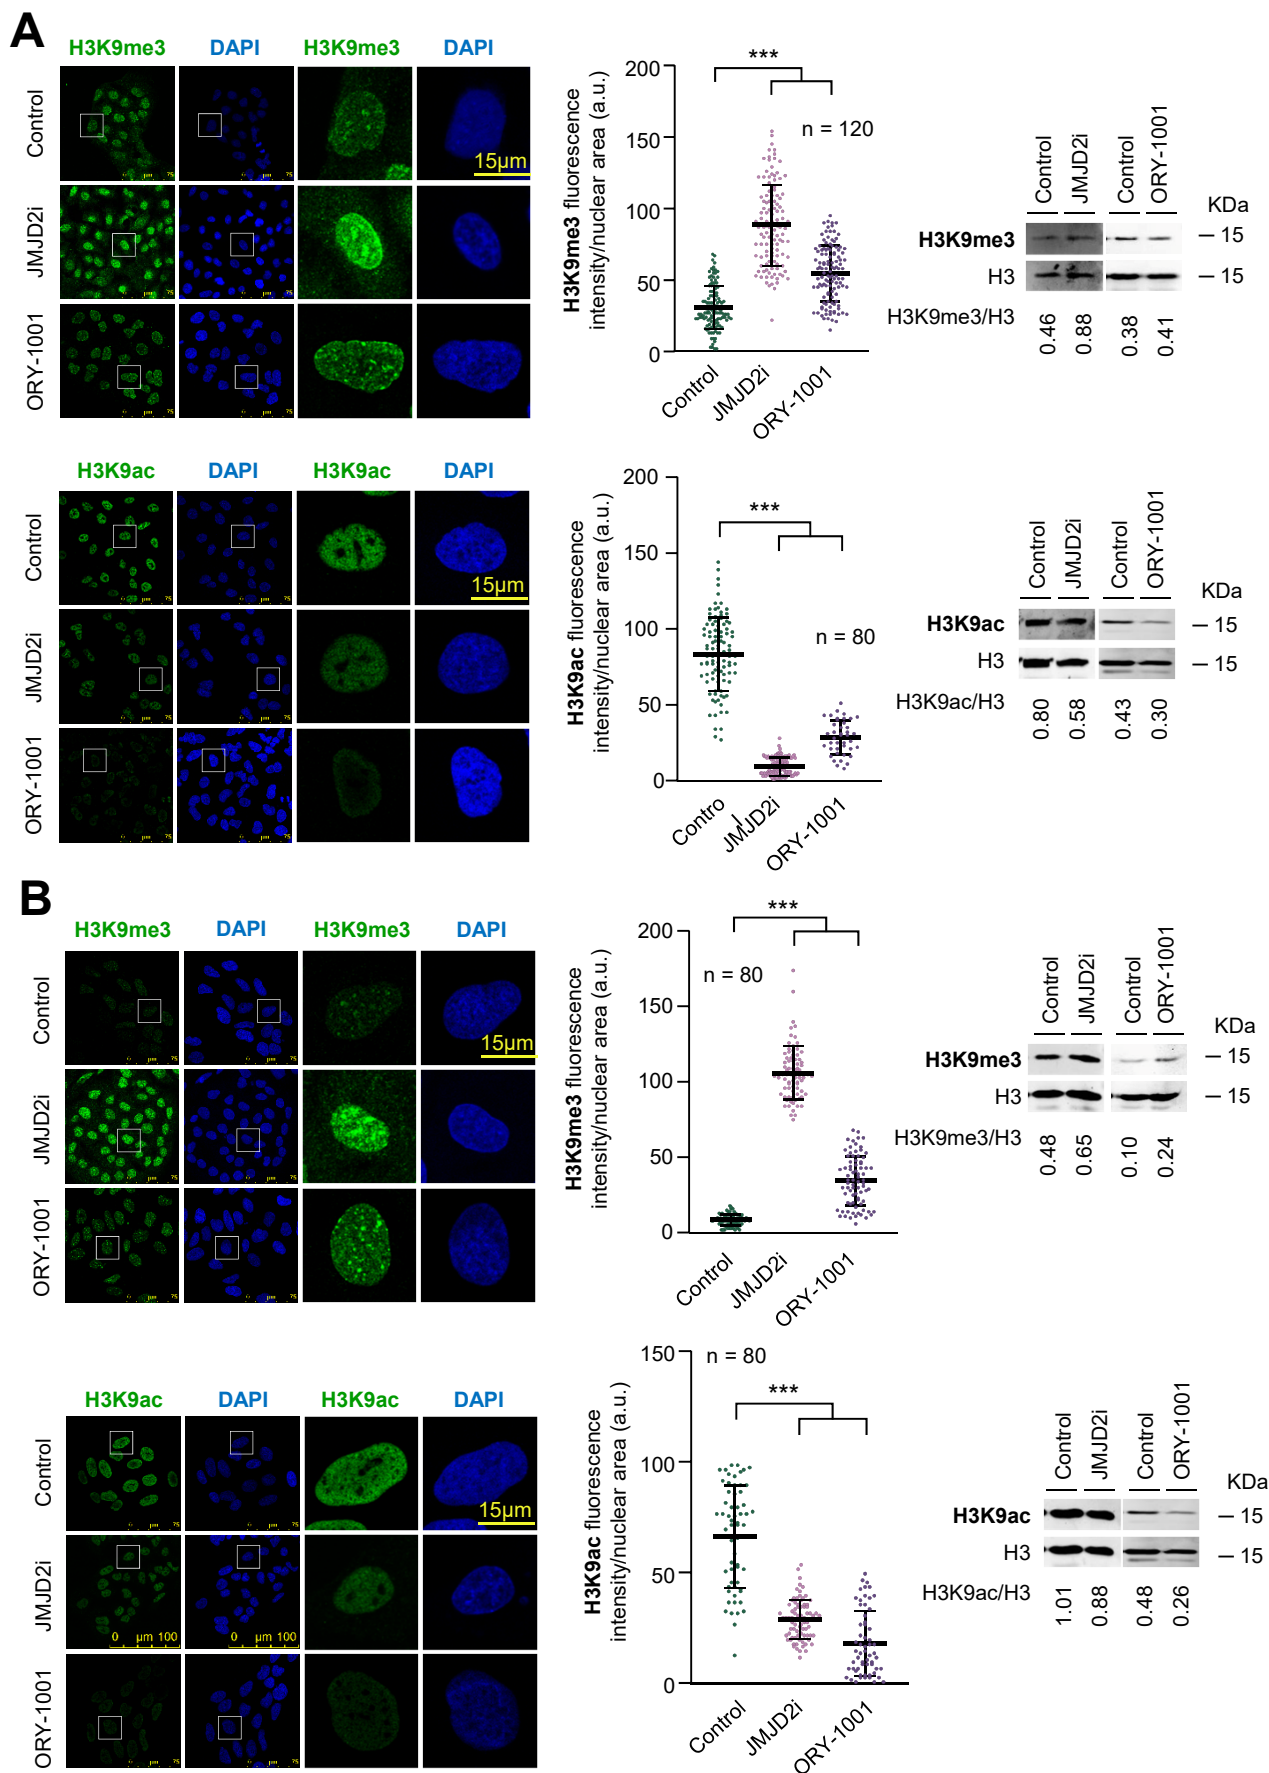

**Figure S12.** Effect of KDM inhibitors on H3K9 acetylation and methylation in A549 (A) and U2OS (B) cells. The quantification of the fluorescence is shown in the middle. The immunoblots are shown on the right.
