# Supplementary material for: The pattern of histone H3 epigenetic posttranslational modifications is regulated by the VRK1 chromatin kinase
Source: PubMed Central journal article supplement (PMC10182654; doi:10.1186/s13072-023-00494-7), 2023-05-13
Supplement: 13072_2023_494_MOESM13_ESM.pdf [file 13072_2023_494_MOESM13_ESM.pdf]

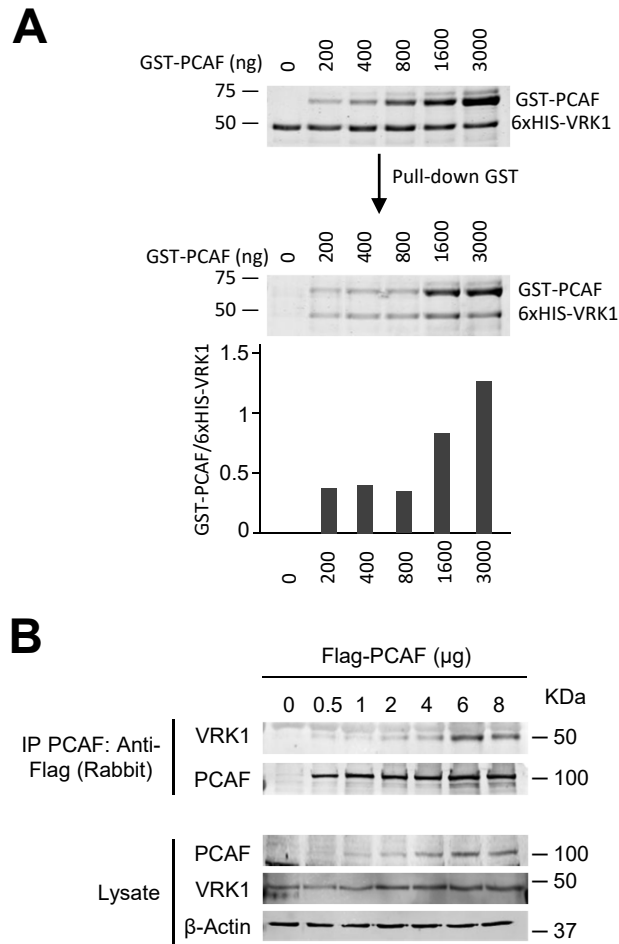

**Figure S13.** Dose-dependent interaction between VRK1 and the PCAF acetyl transferase. **A.** In vitro pull-down assay with increasing amounts of purified GST-PCAF and his-VRK1 (1  $\mu$ g). **B.** Interaction of endogenous VRK1 with increasing amounts of PCAF-Flag transfected in HEK293T cells.
